# Supplementary material for: Common cellular origin and diverging developmental programs for different sesamoid bones
Source: Oxford University Press journal article supplement (doi:10.1242/dev.167452), 2019-02-11
Supplement: dev167452supp.pdf [file dev167452supp.pdf]

**Table S1. In situ hybridization RNA antisense probes**

| RNA Probe Name | Genomic Position | Ref-Seq accession | Size   |
|----------------|------------------|-------------------|--------|
| Sox9           | 50-797           | NM_011448.4       | 747bp  |
| Scleraxis      | Full length      | NM_198885.3       | 964bp  |
| Tenomodulin    | 654-1299         | NM_022322.2       | 645bp  |
| Gdf5           | 1-1437           | NM_008109.3       | 1436bp |
| Tppp3          | 149-680          | NM_026481.3       | 531bp  |
| Irx1           | 503-1109         | NM_010573.2       | 606bp  |
